# Supplementary material for: Evaluation of the Nutritional Quality of Breakfast Cereals Sold on the Italian Market: The Food Labelling of Italian Products (FLIP) Study
Source: MDPI journal article supplement (doi:10.3390/nu11112827), 2019-11-19
Supplement: s1 [file s1]

**Supplementary Table 1.** Definition and examples of the categorization of the breakfast cereals.

| DEFINITION AND EXAMPLES |                |                                                                                                                                                                        |
|-------------------------|----------------|------------------------------------------------------------------------------------------------------------------------------------------------------------------------|
| <b>Type</b>             | Bars           | Cereals made with one or more cereal grains (e.g. oat, rice, wheat) and other ingredients (e.g. dried fruits, nuts, chocolate) and shaped as bars                      |
|                         | Muesli         | Cereals typically made with rolled oat and other cereal grains (e.g. corn, rice, wheat) and other ingredients (e.g. dried fruits, nuts, chocolate)                     |
|                         | Flakes         | Cereals produced with different rolled out and toasted cereals (e.g. corn flakes, wheat flakes)                                                                        |
|                         | Bran cereals   | Bran or bran-based cereals obtained by different grains (e.g. oat, wheat) and sometimes available in different shapes (e.g. sticks)                                    |
|                         | Puffed cereals | Cereals obtained by an expansion process of different cereal grains (e.g. corn, wheat) and sometimes added with other ingredients (mostly cocoa)                       |
|                         | Others         | All the other items not compliant with the above definitions (e.g. cream-filled cereals, cereals with honey)                                                           |
| <b>Gluten free</b>      | No             | Gluten-containing items (e.g. wheat-based breakfast cereals)                                                                                                           |
|                         | Yes            | Cereals made with cereal grains naturally free of gluten (e.g. rice-based cereals)                                                                                     |
| <b>Nutrition claim</b>  | No             | Products not carrying nutrition claim as defined by the European Regulation (CE) No. 1924/2006                                                                         |
|                         | Yes            | Products carrying at least one nutrition claim as defined by the European Regulation (CE) No. 1924/2006 (e.g. “rich in fiber”, “source of vitamin B6”)                 |
| <b>Health Claim</b>     | No             | Products not carrying health claim as defined by the European Regulation (CE) No. 1924/2006                                                                            |
|                         | Yes            | Products carrying at least one nutrition claim as defined by the European Regulation (CE) No. 1924/2006 (e.g. “protein contributes to the maintenance of muscle mass”) |
